# Supplementary material for: High pressure used for producing a new solvate of 1,4-diazabicyclo[2.2.2]octane hydroiodide
Source: Royal Society of Chemistry journal article supplement (doi:10.1039/c5nj01654a), 2015-12-02
Supplement: c5nj01654a1.pdf [file c5nj01654a1.pdf]

## Supplementary Information

# High Pressure Used for Producing a New Solvate of 1,4-Diazabicyclo[2.2.2]octane Hydroiodide

Anna Olejniczak, Marcin Podsiadło and Andrzej Katrusiak\*

*Faculty of Chemistry, Adam Mickiewicz University, Umultowska 89b, 61-614 Poznań, Poland*

\*Corresponding author: [katran@amu.edu.pl](mailto:katran@amu.edu.pl)

**Table S1.** Crystal data and structure-refinements details for high-pressure measurements of  $\text{dabcoHI}\cdot\text{H}_2\text{O}\cdot\text{CH}_3\text{OH}$ .

|                                                                                            | $\text{dabcoHI}\cdot\text{H}_2\text{O}\cdot\text{CH}_3\text{OH}$                                  |
|--------------------------------------------------------------------------------------------|---------------------------------------------------------------------------------------------------|
| Formula                                                                                    | $[\text{C}_6\text{H}_{13}\text{N}_2]^+\text{I}^-\cdot\text{H}_2\text{O}\cdot\text{CH}_3\text{OH}$ |
| Pressure (GPa)                                                                             | 3.10(2)                                                                                           |
| Temperature (K)                                                                            | 296(2)                                                                                            |
| Formula weight                                                                             | 290.14                                                                                            |
| Wavelength (Å)                                                                             | 0.71073                                                                                           |
| Crystal system                                                                             | Monoclinic                                                                                        |
| Space group                                                                                | $C2/c$                                                                                            |
| Unit cell dimensions (Å, °)                                                                |                                                                                                   |
| <i>a</i>                                                                                   | 10.966(3)                                                                                         |
| <i>b</i>                                                                                   | 7.4850(12)                                                                                        |
| <i>c</i>                                                                                   | 23.09(2)                                                                                          |
| $\beta$                                                                                    | 100.94(5)                                                                                         |
| Volume (Å <sup>3</sup> )                                                                   | 1860.6(18)                                                                                        |
| <i>Z</i> , <i>Z'</i>                                                                       | 8, 1                                                                                              |
| Calculated density (g/cm <sup>3</sup> )                                                    | 2.072                                                                                             |
| Absorption coefficient (mm <sup>-1</sup> )                                                 | 3.408                                                                                             |
| <i>F</i> (000)                                                                             | 1152                                                                                              |
| Crystal size (mm)                                                                          | 0.23/0.14/0.09                                                                                    |
| $\theta$ -range for data collection (°)                                                    | 3.31 to 26.40                                                                                     |
| Min/max indices: <i>h</i> , <i>k</i> , <i>l</i>                                            | -13/13, -9/9, -7/7                                                                                |
| Reflect. collected/unique                                                                  | 2065/323                                                                                          |
| <i>R</i> <sub>int</sub>                                                                    | 0.0756                                                                                            |
| Refinement method                                                                          | Full-matrix least-squares on <i>F</i> <sup>2</sup>                                                |
| Completeness (%)                                                                           | 16.9                                                                                              |
| Data/restraints/parameters                                                                 | 323/17/42                                                                                         |
| Goodness-of-fit on <i>F</i> <sup>2</sup>                                                   | 1.086                                                                                             |
| Final <i>R</i> <sub>1</sub> / <i>wR</i> <sub>2</sub> ( <i>I</i> > 2σ <sub><i>I</i></sub> ) | 0.0459/0.1170                                                                                     |
| <i>R</i> <sub>1</sub> / <i>wR</i> <sub>2</sub> (all data)                                  | 0.0920/0.1544                                                                                     |
| Weighting parameters <i>w</i> <sub>1</sub> , <i>w</i> <sub>2</sub> <sup>a)</sup>           | 0.0597, 30.57                                                                                     |
| Largest diff. peak/hole (e·Å <sup>-3</sup> )                                               | 0.364/-0.346                                                                                      |

<sup>a)</sup>  $w=1/(\sigma^2 F_o^2+w_1^2 * P^2+w_2 * P)$ , where  $P=(\text{Max}(F_o^2, 0)+2 * F_c^2)/3$

**Table S2.** The shortest intermolecular and interionic interactions in dabcoHI·H<sub>2</sub>O·CH<sub>3</sub>OH structure at 3.10 GPa/296 K.

| DH···A            | H···A (Å) | D···A (Å) | DH···A (°) | Symmetry code |
|-------------------|-----------|-----------|------------|---------------|
| O(9)-H(9a)···N(2) | 1.79(1)   | 2.74(2)   | 166        | x,y,z         |
| O(8)-H(8)···N(2)  | 2.60(1)   | 3.27(3)   | 140        | x,y,z         |
| O(8)-H(8)···O(9)  | 2.49(1)   | 3.10(3)   | 132        | x,y,z         |
| N(1)-H(1)···O(8)  | 2.49(1)   | 3.10(4)   | 125        | x,y-1,z       |
| N(1)-H(1)···O(9)  | 2.00(2)   | 2.80(2)   | 146        | x,y-1,z       |
| O(9)-H(9b)···I(1) | 2.38(1)   | 3.35(4)   | 166        | x,y,z         |
| O(8)-H(8)···I(2)  | 2.71(1)   | 3.25(6)   | 125        | x,y,z         |
| C(2)-H(2A)···O8   | 2.44(3)   | 3.22(3)   | 138        | x,y-1,z       |
| C(3)-H(3B)···O8   | 2.50(3)   | 3.04(3)   | 114        | 0.5+x,y-0.5,z |
| C(4)-H(4A)···O9   | 2.54(2)   | 3.02(2)   | 111        | x-0.5,y-0.5,z |
| C(3)-H(3B)···O9   | 2.56(2)   | 3.04(2)   | 110        | x-0.5,y-0.5,z |

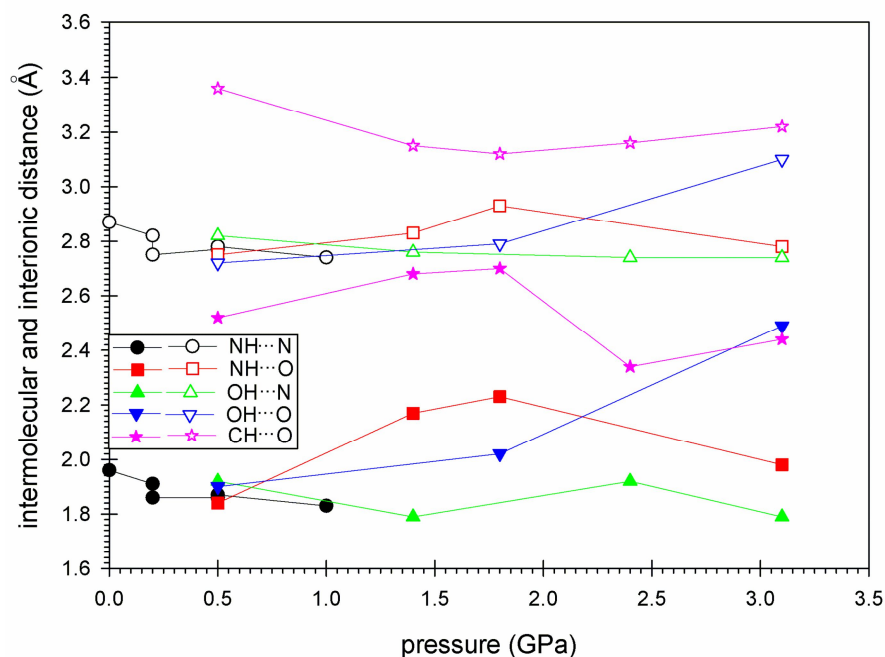

**Figure S1.** Pressure dependence of hydrogen-bond distances in the dabcoHI polymorphs (black symbols), dabcoHI hydrates, methanol solvates of disalt dabco2HI·3CH<sub>3</sub>OH and N-methylated dabcoCH<sub>3</sub>I·2CH<sub>3</sub>OH, as well as in mixed solvate dabcoHI·H<sub>2</sub>O·CH<sub>3</sub>OH. The lines are for guiding the eye, as they link the points representing distances in different polymorphs and solvates. Full and open symbols denote the corresponding H...acceptor and H-donor...acceptor distances, respectively. Standard deviations are equal or smaller than the size of the symbols (*cf.* Table S2).
